# Supplementary material for: Noncovalent functionalization of a nanofibrous network with a bio-inspired heavy metal binding peptide
Source: Royal Society of Chemistry journal article supplement (doi:10.1039/c3ra43930e), 2013-01-01
Supplement: c3ra43930e.pdf [file c3ra43930e.pdf]

## Supporting Information

for

### Noncovalent Functionalization of Electrospun Fibrous Network with Bioinspired Heavy Metal Binding Peptide

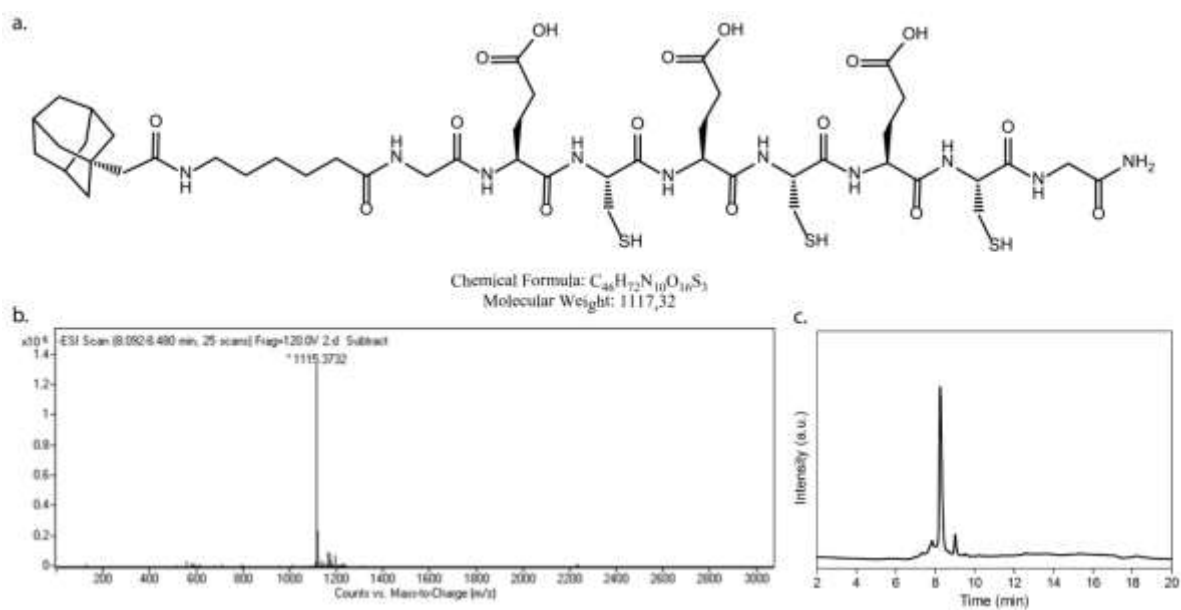

**Figure S1.** a. Chemical structure of PMP b. Mass spectrum of PMP after subtracting mass spectra of water sample at that time interval. Mass data  $[M-H]^-$  (calculated) = 1116.43;  $[M-H]^-$  (observed) = 1115.37 c. Liquid chromatogram of PMP after dialysis.

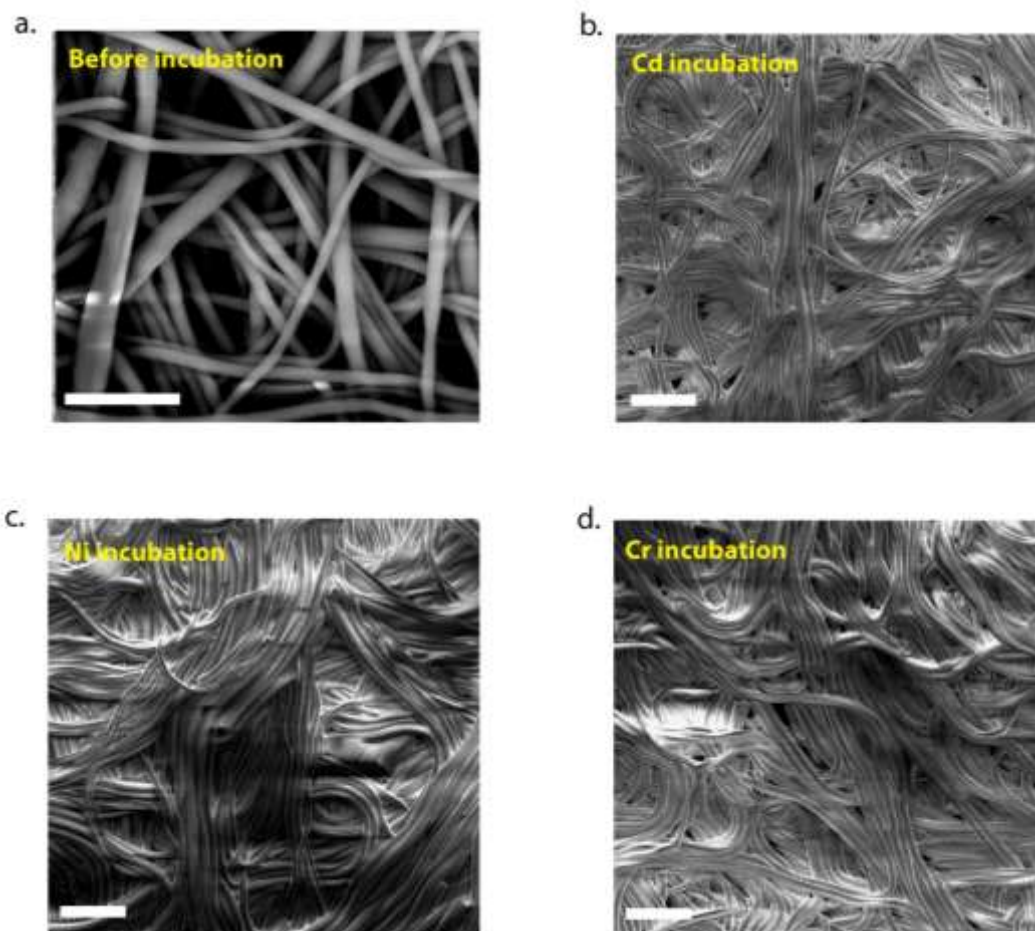

**Figure S2.** SEM images of PMP-CDNF a.before and after incubation in b. Cd, c. Ni and d. Cr solutions (scale bars: 10 μm).

**Table S1.** Atom percentages of PMP-CDNF in terms of XPS spectrum of PMP-CDNF.

| O1s   | C1s   | N1s | P2p  | S2p  |
|-------|-------|-----|------|------|
| 26.97 | 61.72 | 5.9 | 3.38 | 2.04 |

**Table S2.** Atom weight percentages of PMP, CDNF, and CDNF treated with TCEP and TRIS and PMP-CDNF in terms of CHNS-O analyzer.

| Compound                          | wt % C            | wt % H         | wt % N         | wt % S         |
|-----------------------------------|-------------------|----------------|----------------|----------------|
| PMP                               | 46.119±<br>0.5075 | 5.8676± 0.2769 | 11.156± 0.1063 | 7.9138± 0.0842 |
| CDNF                              | 46.888±0.648<br>3 | 6.7914± 0.1449 | 0              | 0              |
| PMP-CDNF                          | 43.572±0.283<br>9 | 6.4800± 0.0123 | 1.2238± 0.0546 | 0.4751± 0.0349 |
| CDNF treated<br>with<br>TCEP&TRIS | 44.670±1.089<br>4 | 6.8153± 0.0326 | 0.8670± 0.2824 | 0              |

**Table S3.** Comparison of experimental and theoretical [C]/[S], [N]/[S], [H]/[S], and [C]/[N] of PMP.

| Compound             | [C]/[S] | [N]/[S] | [H]/[S] | [C]/[N] |
|----------------------|---------|---------|---------|---------|
| Experimental-<br>PMP | 15.540  | 3.2222  | 23.726  | 4.823   |
| Theoretical -<br>PMP | 15.333  | 3.3333  | 23.000  | 4.6000  |
| % Difference         | 1.0135  | 0.9667  | 1.0315  | 1.0484  |

**Table S4.** PMP and HP $\beta$ CD amount in 100 g PMP-CDNF.

| PMP <sup>[a,b,c]</sup> (g) | CDNF <sup>[c]</sup> (g) | PMP <sup>[a,c]</sup> (mol) | CDNF <sup>[c]</sup> (mol) |
|----------------------------|-------------------------|----------------------------|---------------------------|
| 5.5080                     | 94.492                  | 0.0049                     | 0.0647                    |

<sup>a</sup>Calculated in terms of S amount in PMP immobilized fiber and experimental S content in PMP elemental analysis. <sup>b</sup>Calculated based on deprotonated PMP molecular weight. <sup>c</sup>Amount of molecules in 100 g PMP-CDNF.

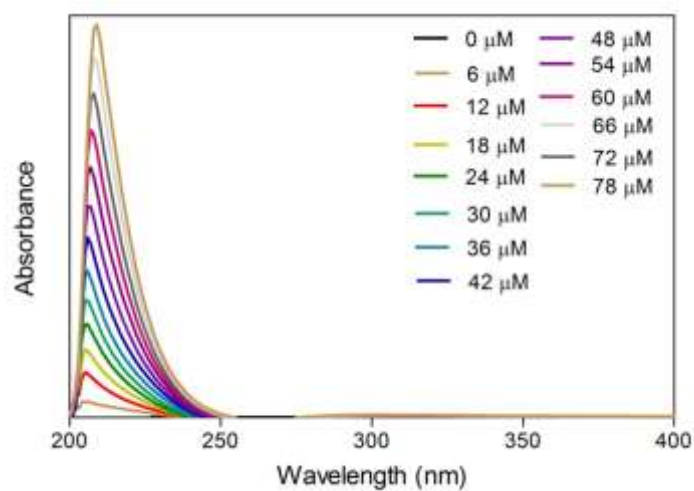

**Figure S3.** Absorbance of PMP in 50 mM TRIS buffer at pH 8.0.

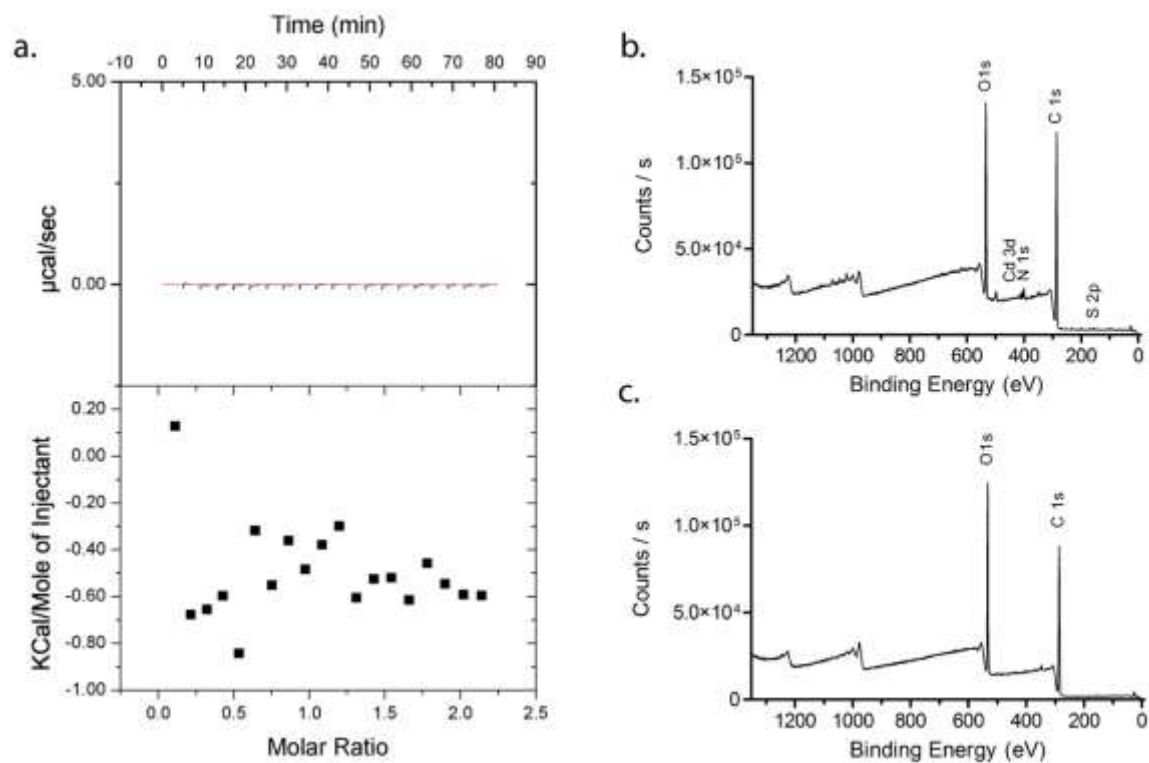

**Figure S4.** a. Isothermal titration curve of HPβCD molecule with CdCl<sub>2</sub> solution. XPS spectra of b. PMP-CDNF and c. CDNF after incubation in Cd<sup>II</sup> solution.

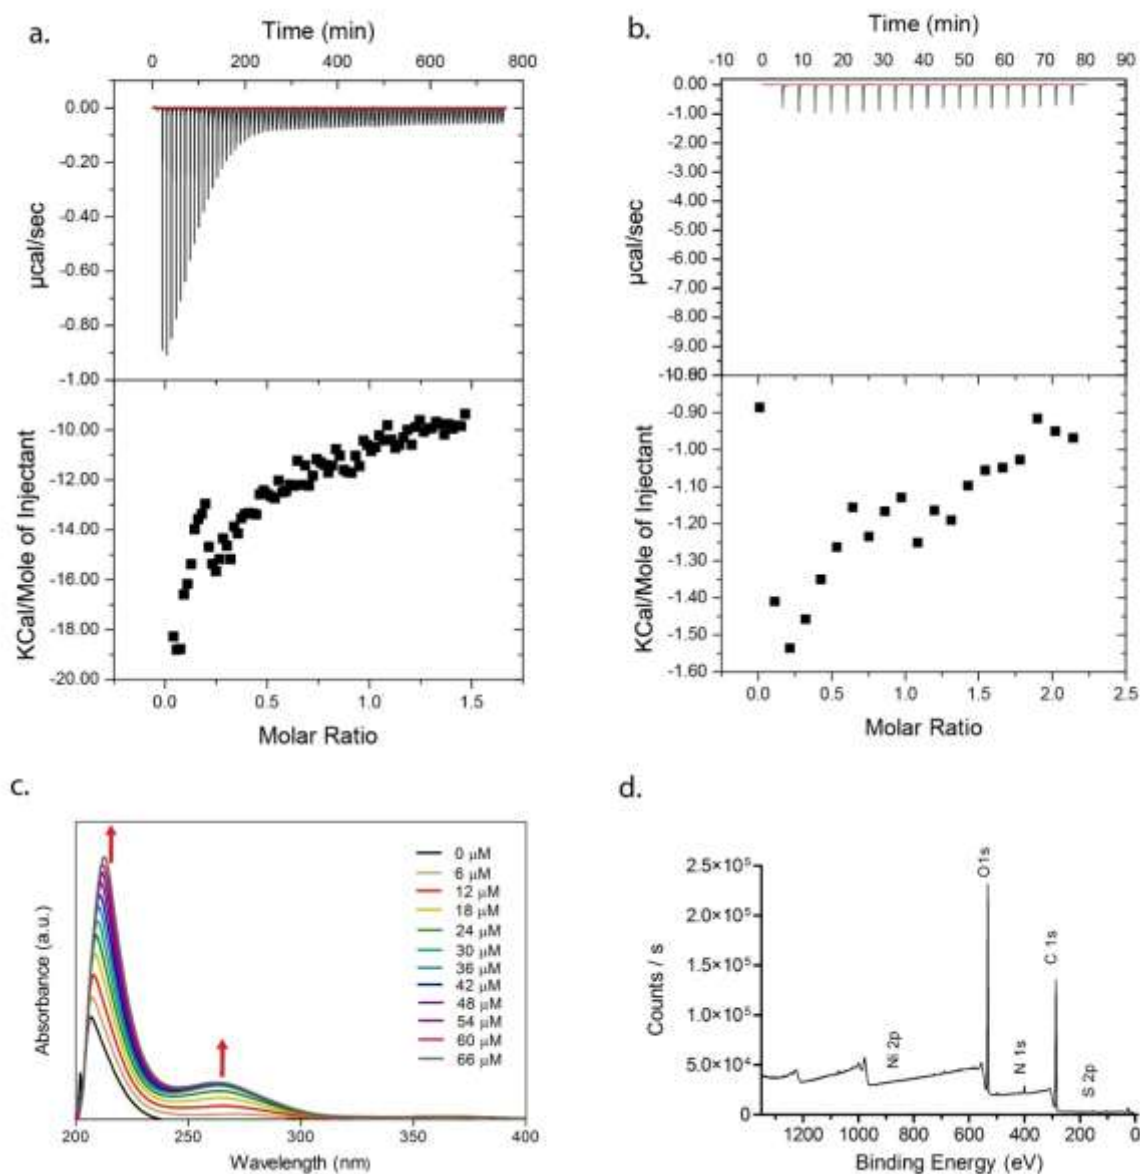

**Figure S5.** Isothermal titration curve of a. PMP and b. HPβCD molecule with Ni(NO<sub>3</sub>)<sub>2</sub> solution. c. Absorption change in 20 μM Ni(NO<sub>3</sub>)<sub>2</sub> titration with PMP solution in 50 mM TRIS buffer at pH 8.0. d. XPS spectrum of PMP-CDNF after incubation in Ni<sup>II</sup> solution.

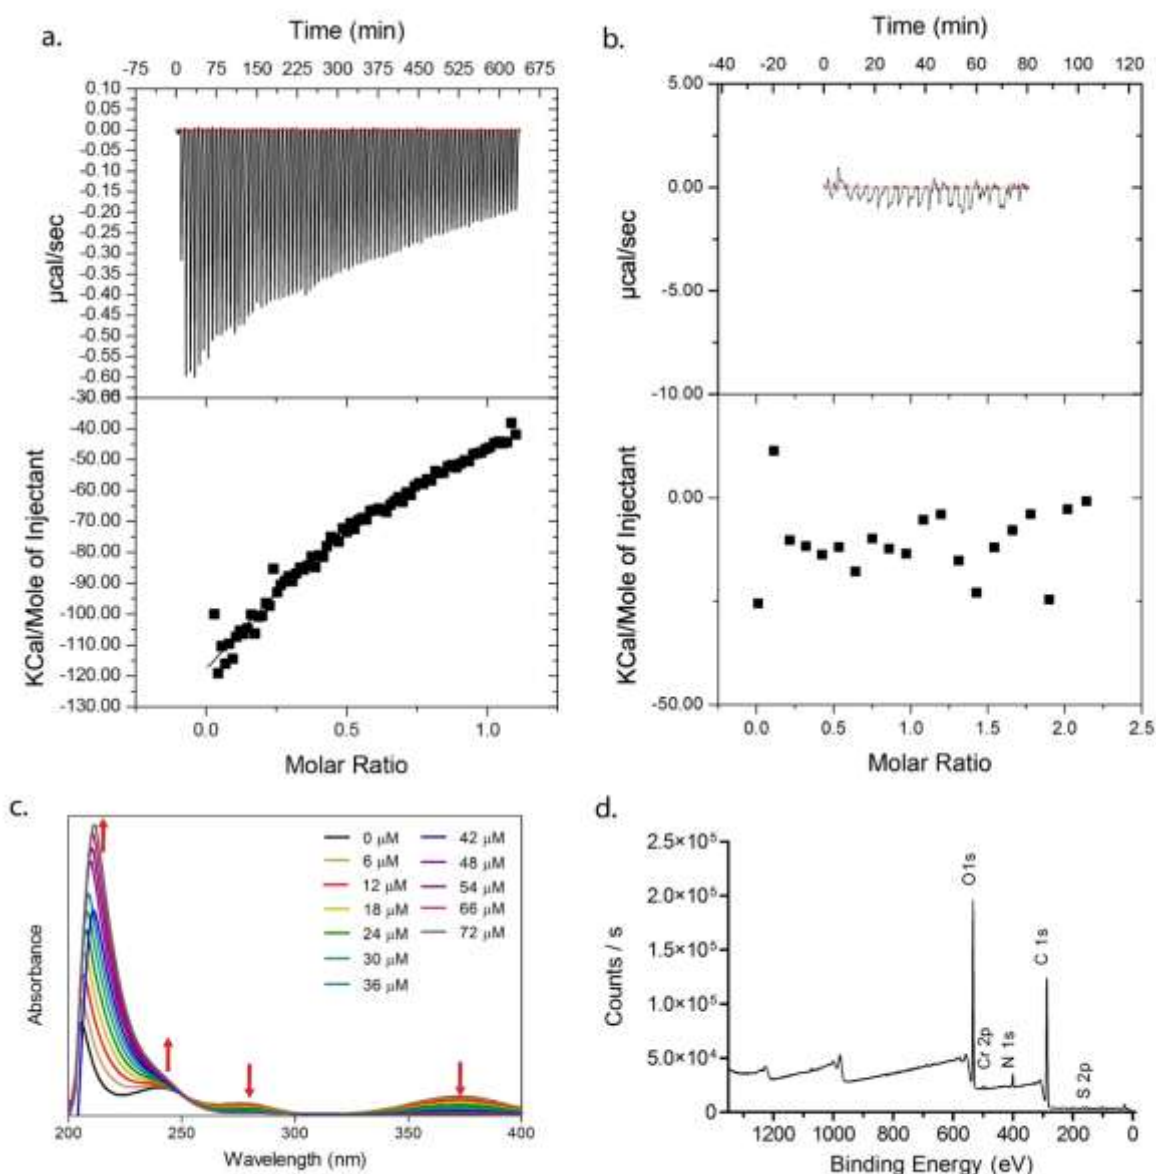

**Figure S6.** Isothermal titration curve of a. PMP and b. HPβCD molecule with  $K_2Cr_2O_7$  solution. c. Absorption change in 20  $\mu\text{M}$   $K_2Cr_2O_7$  titration with PMP solution in 50 mM TRIS buffer at pH 8.0. XPS spectra of d. PMP-CDNF after incubation in  $Cr^{VI}$  solution.

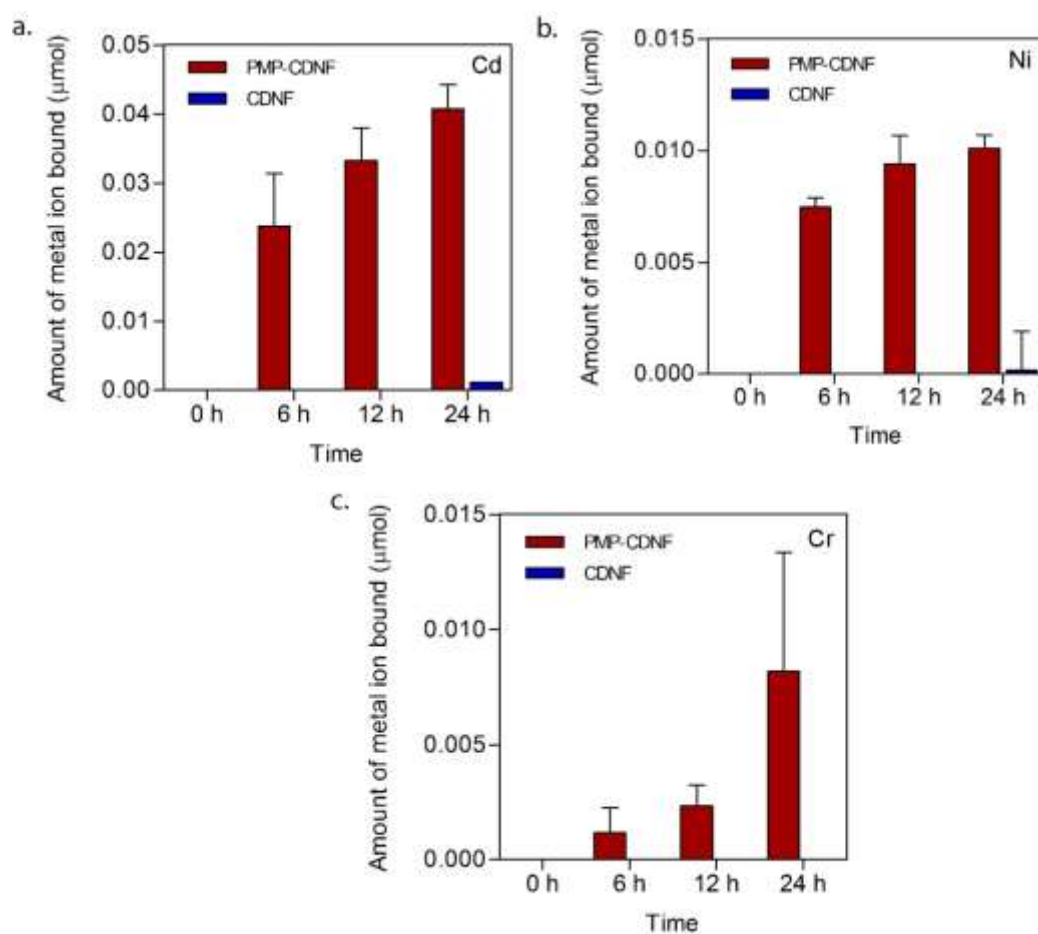

**Figure S7.** The amount of metal ions a. Cd, b. Ni and c. Cr in  $\mu\text{mol}$  concentrations bound to per mg of the PMP-CDNF system and bare CDNF from different metal solutions.
